# Supplementary material
Source: Royal Society of Chemistry journal article supplement (doi:10.1039/d6nj01464j)
Supplement: d6nj01464j1.pdf [file d6nj01464j1.pdf]

## Supplementary Information

### **Covalent Locking of Carbon Dots in Imprinted Chitosan Gel Beads for Reusable, Visual Tetracycline Detection**

Chaojie Yu,<sup>a</sup> Yuxin Sang,<sup>b</sup> Ziqi Liu,<sup>a</sup> Haihong Huang,<sup>a</sup> Zuwei Song,<sup>a</sup> Weina Li,<sup>\*a</sup>  
Qinxing Sun<sup>\*a</sup>

*a College of Chemistry and Pharmaceutical Sciences, Qingdao Agricultural  
University, Qingdao, 266109, China*

*b College of Materials Science and Chemical Engineering, Harbin Engineering  
University, Harbin 150001, China*

*\* Correspondence to: Qingdao Agricultural University, 700 Changcheng Road,  
Qingdao 266109, China*

*\*Corresponding author*

E-mail: wnli@qau.edu.cn (W. N. Li),

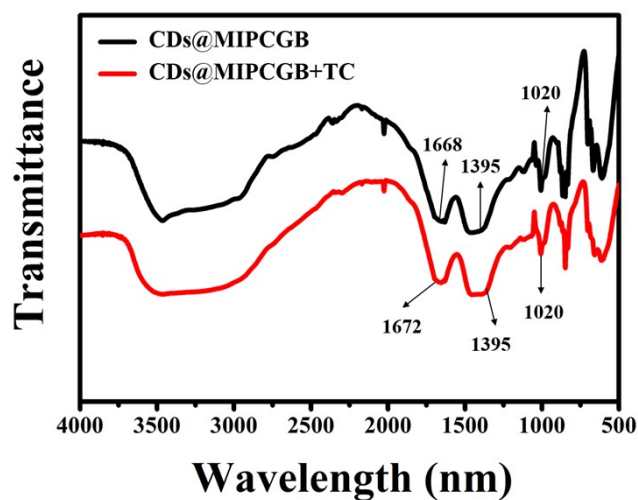

Fig. S1. FT-IR spectra of CDs@MIPCGB (black) and CDs@MIPCGB+TC (red).

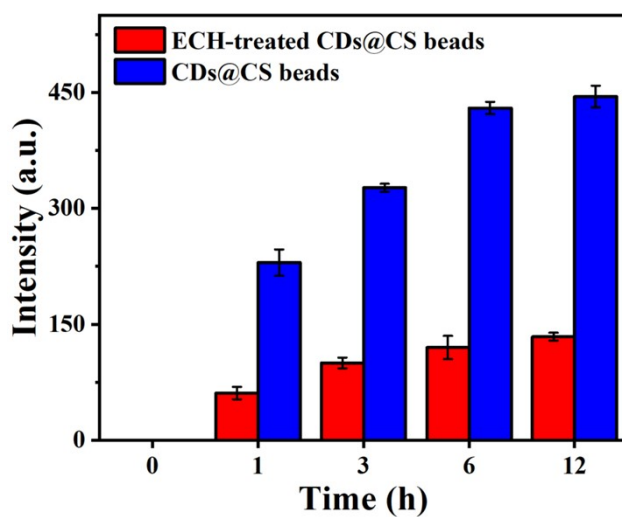

Fig. S2. Comparison of supernatant fluorescence between ECH-treated beads and a physically entrapped control under repeated washing/regeneration conditions.

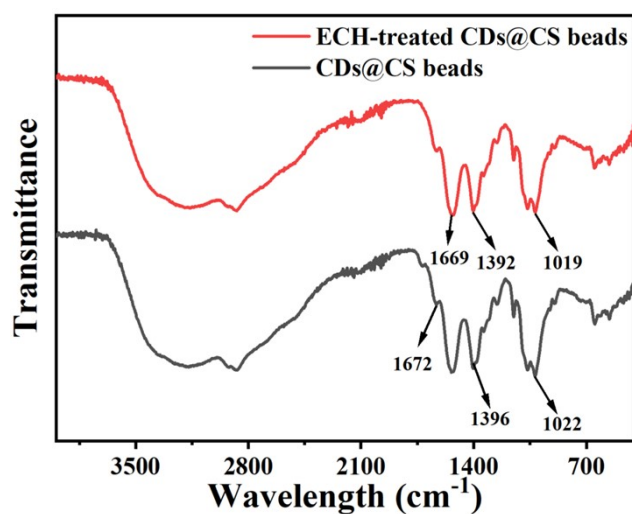

Fig. S3. Comparative FTIR spectra of CDs before and after ECH treatment.

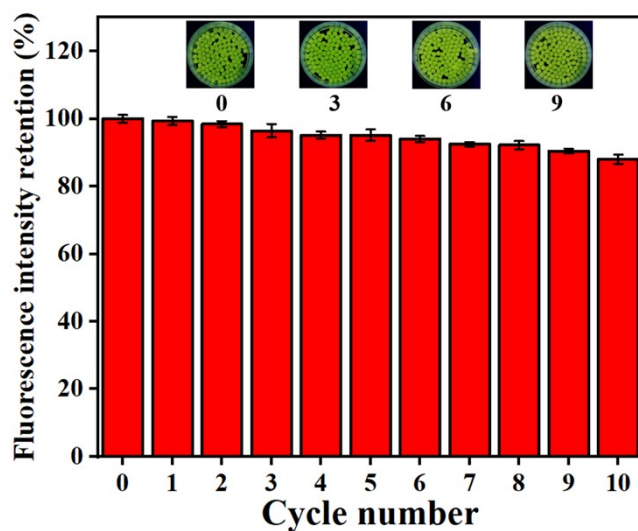

**Fig. S4.** Fluorescence response of CDs@MIPCGB to TC in 10 regeneration cycles and the corresponding fluorescent photographs of CDs@MIPCGB after 0, 3, 6 and 9 cycles.

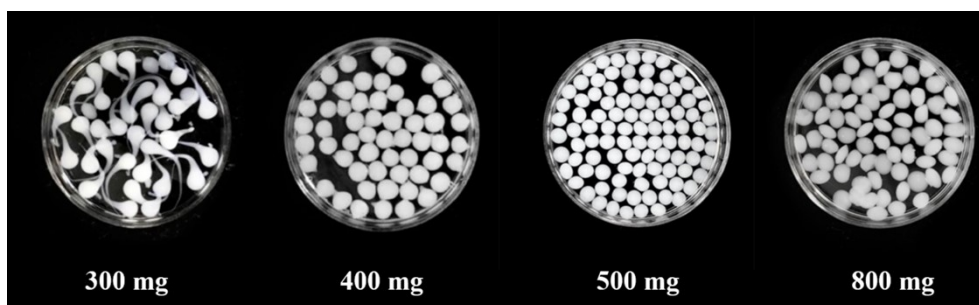

**Fig. S5.** Pellets morphology of chitosan with different concentrations.

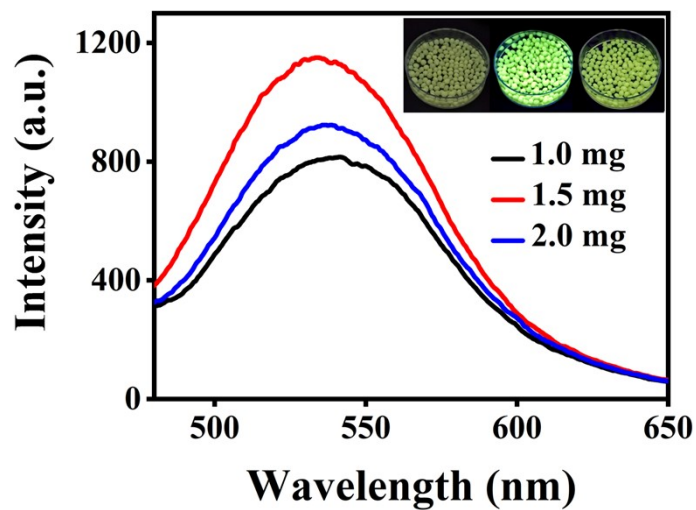

**Fig. S6.** Fluorescence spectra of the MIP chitosan gel beads with CDs doping amount varied from 1.0 mg to 2.0 mg. Inset: the corresponding photographs under UV light.

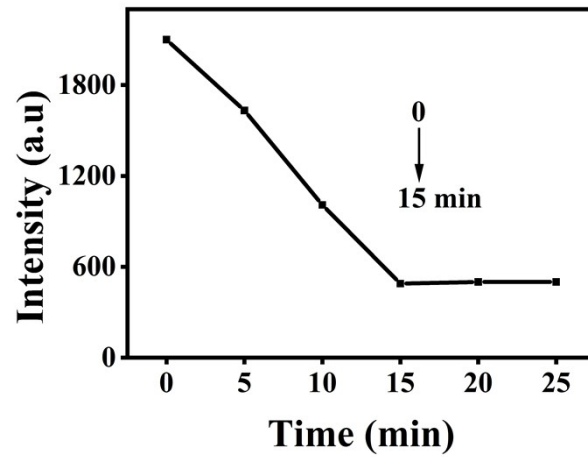

**Fig. S7.** The fluorescence intensity change of CDs@MIPCGB with incubation time as the addition of TC.

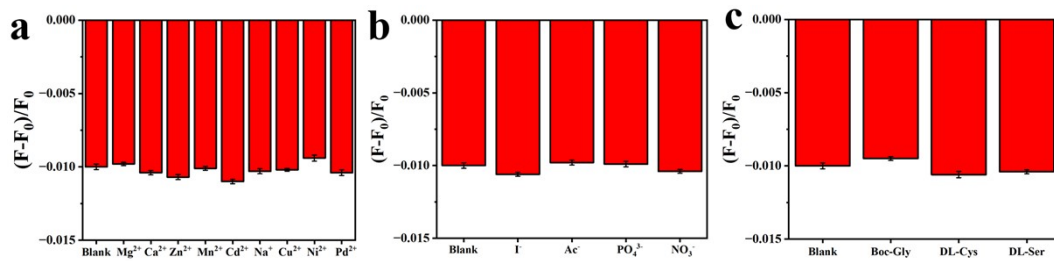

**Fig. S8.** Fluorescence responses of CDs@MIPCGB toward different (a) metal cations, (b) anions and (c) amino acids.

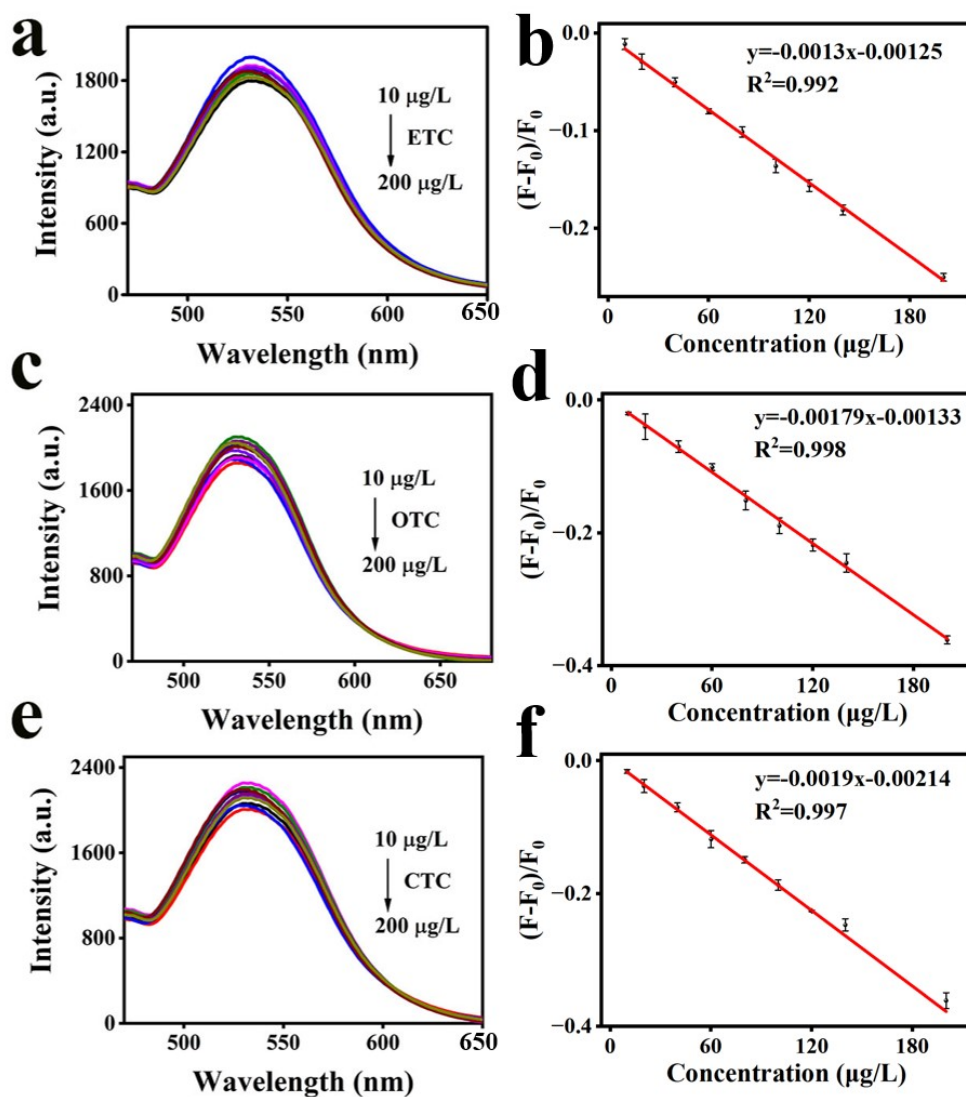

**Fig. S9.** (a) The fluorescence of CDs@MIPCGB with various concentrations of ETC. (b) The linear relationship between the fluorescence intensity change of CDs@MIPCGB and the concentration of ETC within the range of 10-200 µg/L. (c) The fluorescence of CDs@MIPCGB with various concentrations of OTC. (d) The linear relationship between the fluorescence intensity change of CDs@MIPCGB and the concentration of OTC within the range of 10-200 µg/L. (e) The fluorescence of CDs@MIPCGB with various concentrations of CTC. (f) The linear relationship between the fluorescence intensity change of CDs@MIPCGB and the concentration of CTC within the range of 10-200 µg/L.

**Table S1 Inter-day, intra-day and inter-batch recovery of CDs@MIPCGB at three levels of different concentrations TC with fluorescence method.**

| Compounds | Spiked level (µg/L) | Intra-day              |              |         | Inter-day              |              |         | Inter-batch            |              |         |
|-----------|---------------------|------------------------|--------------|---------|------------------------|--------------|---------|------------------------|--------------|---------|
|           |                     | Detection of TC (µg/L) | Recovery (%) | RSD (%) | Detection of TC (µg/L) | Recovery (%) | RSD (%) | Detection of TC (µg/L) | Recovery (%) | RSD (%) |
| TC        | 30                  | 30.1                   | 100.3        |         | 29.6                   | 98.7         |         | 29.4                   | 98.0         |         |
|           |                     | 29.8                   | 99.3         | 2.80    | 30.7                   | 102.3        | 1.83    | 30.1                   | 100.3        | 1.21    |
|           |                     | 31.4                   | 104.7        |         | 30.2                   | 100.7        |         | 29.9                   | 99.7         |         |
|           | 80                  | 81.3                   | 101.6        |         | 80.2                   | 100.2        |         | 80.7                   | 100.9        |         |
|           |                     | 79.3                   | 99.1         | 1.26    | 82.1                   | 102.6        | 1.39    | 79.3                   | 99.1         | 1.64    |
|           |                     | 80.6                   | 100.8        |         | 80.1                   | 100.1        |         | 78.1                   | 97.6         |         |
|           |                     | 161.3                  | 100.8        |         | 162.4                  | 101.5        |         | 161.2                  | 100.8        |         |
|           | 160                 | 162.9                  | 101.8        | 1.12    | 158.7                  | 99.2         | 1.18    | 160.1                  | 100.1        | 0.72    |
|           |                     | 159.3                  | 99.6         |         | 159.9                  | 99.9         |         | 158.9                  | 99.3         |         |

**Table S2 Inter-day, intra-day and inter-batch recovery of CDs@MIPCGB at three levels of different concentrations TC with smartphone (RGB) method.**

| Compounds | Spiked level (µg/L) | Intra-day              |              |         | Inter-day              |              |         | Inter-batch            |              |         |
|-----------|---------------------|------------------------|--------------|---------|------------------------|--------------|---------|------------------------|--------------|---------|
|           |                     | Detection of TC (µg/L) | Recovery (%) | RSD (%) | Detection of TC (µg/L) | Recovery (%) | RSD (%) | Detection of TC (µg/L) | Recovery (%) | RSD (%) |
| TC        | 30                  | 30.1                   | 100.3        |         | 29.2                   | 97.3         |         | 30.4                   | 101.3        |         |
|           |                     | 29.5                   | 98.3         | 3.02    | 29.9                   | 99.7         | 2.85    | 30.8                   | 102.7        | 2.02    |
|           |                     | 31.3                   | 104.3        |         | 30.9                   | 103.0        |         | 29.6                   | 98.7         |         |
|           | 80                  | 81.2                   | 101.5        |         | 80.3                   | 100.4        |         | 81.4                   | 101.8        |         |
|           |                     | 82.1                   | 102.6        | 1.11    | 81.5                   | 101.9        | 1.25    | 80.2                   | 100.2        | 1.31    |
|           |                     | 80.3                   | 100.4        |         | 79.5                   | 99.4         |         | 79.3                   | 99.1         |         |
|           |                     | 162.2                  | 101.4        |         | 161.4                  | 100.9        |         | 160.2                  | 100.1        |         |
|           | 160                 | 159.6                  | 99.8         | 0.85    | 160.1                  | 100.1        | 0.44    | 158.1                  | 98.8         | 1.07    |
|           |                     | 160.2                  | 100.1        |         | 161.2                  | 100.8        |         | 161.5                  | 100.9        |         |

1 **Table S3 Cross-device consistency of smartphone-assisted TC quantification using**  
 2 **CDs@MIPCGB under standardized imaging conditions (n = 3).**

| Concentration of TC ( $\mu\text{g/L}$ ) | Devices            | Recovery (%)    | RSD (%) |
|-----------------------------------------|--------------------|-----------------|---------|
| 20                                      | Huawei nova 13 Pro | $100.4 \pm 2.1$ | 2.1     |
|                                         | REDMI K80          | $99.7 \pm 1.8$  | 1.8     |
|                                         | Vivo S20           | $102.6 \pm 1.6$ | 1.6     |
| 80                                      | Huawei nova 13 Pro | $98.7 \pm 2.4$  | 2.4     |
|                                         | REDMI K80          | $97.6 \pm 3.1$  | 3.2     |
|                                         | Vivo S20           | $101.4 \pm 2.4$ | 2.4     |
| 140                                     | Huawei nova 13 Pro | $96.9 \pm 1.4$  | 1.4     |
|                                         | REDMI K80          | $97.8 \pm 1.9$  | 1.9     |
|                                         | Vivo S20           | $99.7 \pm 2.6$  | 2.6     |
| 200                                     | Huawei nova 13 Pro | $102.1 \pm 3$   | 2.9     |
|                                         | REDMI K80          | $100.6 \pm 2.9$ | 2.9     |
|                                         | Vivo S20           | $98.5 \pm 1.4$  | 1.4     |

3

4 **Table S4 Determination of TC in milk samples using CDs@MIPCGB through fluorescence**  
 5 **intensity change, n=3.**

| Spiked ( $\mu\text{g/L}$ ) | Fluorescence spectra                |              |         | Smartphone                          |                                                                                       |              |         |
|----------------------------|-------------------------------------|--------------|---------|-------------------------------------|---------------------------------------------------------------------------------------|--------------|---------|
|                            | Detection of TC ( $\mu\text{g/L}$ ) | Recovery (%) | RSD (%) | Detection of TC ( $\mu\text{g/L}$ ) | Images                                                                                | Recovery (%) | RSD (%) |
|                            | 48.6                                | 97.3         |         | 49.2                                |  | 98.4         |         |
| 50                         | 51.2                                | 102.4        | 2.64    | 51.4                                |  | 102.8        | 2.24    |
|                            | 50.3                                | 100.6        |         | 49.9                                |  | 99.8         |         |
|                            | 99.6                                | 99.6         |         | 101.7                               |  | 101.7        |         |
| 100                        | 103.2                               | 103.2        | 1.81    | 100.3                               |  | 100.3        | 1.05    |
|                            | 102.1                               | 102.1        |         | 102.4                               |  | 102.4        |         |
|                            | 154.6                               | 103.1        |         | 149.1                               |  | 99.4         |         |
| 150                        | 150.2                               | 100.1        | 1.51    | 153.7                               |  | 102.5        | 1.57    |
|                            | 151.3                               | 100.9        |         | 150.4                               |  | 100.3        |         |

6

1 **Table S5 Comparison of this proposed method with previously reported methods for TC detection**  
 2 **in different samples.**

| <b>Probe</b>                       | <b>Sample</b>            | <b>Linear range<br/>(<math>\mu\text{g/L}</math>)</b> | <b>LOD<br/>(nM)</b> | <b>Detecti<br/>on time</b> | <b>References</b> |
|------------------------------------|--------------------------|------------------------------------------------------|---------------------|----------------------------|-------------------|
| MIPs-AA/CQDs                       | water                    | 444-26640                                            | 170                 | 10 min                     | [1]               |
| FeCu-MOF@MIP                       | milk                     | 0-44.4                                               | 12.64               | 12 min                     | [2]               |
| CdTe QD-<br>SiO <sub>2</sub> @MIPs | milk and<br>bovine serum | 222-6660 and 222-<br>22200                           | 140 and 190         | 2 h                        | [3]               |
| ZIF-8&N-<br>CDs@MIP                | milk and egg             | 100-4000                                             | 101.35              | 30 min                     | [4]               |
| QD/MS/MIP                          | serum                    | 50-1000                                              | 33.78               | 10 min                     | [5]               |
| MIP@paper                          | water                    | 100-300                                              | 90.09               | 5 min                      | [6]               |
| CDs@MIPCGB                         | milk                     | 10-200                                               | 12.23               | 15 min                     | this work         |

3

## 1 References

- 2 [1] X. Wei, L. Lv, Z. D. Zhang and W. S. Guan, *J. Appl. Polym. Sci.*, 2020, 137, e49126.
- 3 [2] L. Zhang, M. P. Shen, Z. D. Li, F. X. Meng, J. K. Wang, A. Li, L. Wang, Y. N. Qin and M. W.
- 4 Zhang, *Sens. Actuators B Chem.*, 2025, 432, 137445.
- 5 [3] Y. Q. Yang, H. Niu and H. Q. Zhang, *ACS Appl. Mater. Interfaces*, 2016, 8, 15741-15749.
- 6 [4] J. N. Zhang, Y. Li, L. H. Teng, Y. C. Cao, X. L. Hu, G. Z. Fang and S. Wang, *Anal. Chim. Acta*,
- 7 2023, 1251, 341032.
- 8 [5] L. Zhang and L. Chen, *ACS Appl. Mater. Interfaces*, 2016, 8, 16248-16256.
- 9 [6] D. Barzallo, E. Palacio, L. Ferrer and M. D. T. Sotomayor, *Talanta*, 2025, 281, 126856.
- 10
